# Supplementary material for: Long Non-coding RNA LINC00339 Stimulates Glioma Vasculogenic Mimicry Formation by Regulating the miR-539-5p/TWIST1/MMPs Axis
Source: PubMed Central journal article supplement — Mol Ther Nucleic Acids. 2017 Nov 26;10:170–86. doi: 10.1016/j.omtn.2017.11.011 (PMC5751969; doi:10.1016/j.omtn.2017.11.011), 2017-11-26
Supplement: mmc1.pdf [file mmc1.pdf]

OMTN, Volume 10

## **Supplemental Information**

**Long Non-coding RNA LINC00339 Stimulates Glioma**

**Vasculogenic Mimicry Formation by Regulating**

**the miR-539-5p/TWIST1/MMPs Axis**

**Junqing Guo, Heng Cai, Xiaobai Liu, Jian Zheng, Yunhui Liu, Wei Gong, Jiajia Chen, Zhuo Xi, and Yixue Xue**

Fig.1

B

| NBTs | LGGTs | HGGTs | n=3, NBTs group; n=10, each glioma tissue gro |  |  |  |  |
|------|-------|-------|-----------------------------------------------|--|--|--|--|
| 0.88 | 2.23  | 4.99  |                                               |  |  |  |  |
| 1.13 | 3.04  | 4.11  |                                               |  |  |  |  |
| 0.91 | 1.88  | 6.08  |                                               |  |  |  |  |
|      | 3.39  | 7.21  |                                               |  |  |  |  |
|      | 2.66  | 4.72  |                                               |  |  |  |  |
|      | 1.25  | 4.33  |                                               |  |  |  |  |
|      | 2.81  | 5.61  |                                               |  |  |  |  |
|      | 2.55  | 3.92  |                                               |  |  |  |  |
|      | 3.72  | 6.52  |                                               |  |  |  |  |
|      | 0.94  | 4.08  |                                               |  |  |  |  |

C

| NHA  | U87  | U251 | n=6, each |  |
|------|------|------|-----------|--|
| 0.64 | 2.21 | 2.19 |           |  |
| 1.33 | 3.28 | 3.13 |           |  |
| 1.48 | 1.73 | 1.65 |           |  |
| 0.93 | 2.88 | 2.74 |           |  |
| 1.89 | 4.06 | 3.81 |           |  |
| 0.79 | 1.11 | 0.99 |           |  |

D

|     | NBTs | LGGTs | HGGTs |
|-----|------|-------|-------|
| VM+ | 0    | 2     | 4     |
| VM- | 3    | 8     | 6     |

Fig.2A

|         | U87  |             |         | U251 |             |  |           |
|---------|------|-------------|---------|------|-------------|--|-----------|
| Control | shNC | shLINC00339 | Control | shNC | shLINC00339 |  | n=5, each |
| 1.11    | 1.08 | 0.24        | 1.14    | 1.05 | 0.35        |  |           |
| 1.26    | 1.18 | 0.15        | 1.30    | 1.21 | 0.26        |  |           |
| 0.88    | 0.83 | 0.43        | 0.93    | 0.83 | 0.49        |  |           |
| 1.25    | 1.20 | 0.35        | 1.38    | 1.23 | 0.42        |  |           |
| 0.85    | 0.87 | 0.11        | 0.91    | 0.86 | 0.29        |  |           |

B

| U87     |        |             | U251    |        |             |           |  |
|---------|--------|-------------|---------|--------|-------------|-----------|--|
| Control | shNC   | shLINC00339 | Control | shNC   | shLINC00339 | n=5, each |  |
| 100.00  | 90.21  | 45.00       | 100.00  | 100.00 | 50.33       |           |  |
| 70.86   | 79.68  | 19.24       | 80.22   | 77.34  | 39.45       |           |  |
| 140.53  | 128.50 | 65.72       | 135.44  | 132.06 | 68.39       |           |  |
| 112.39  | 105.74 | 53.24       | 72.13   | 81.14  | 20.18       |           |  |
| 82.41   | 75.41  | 30.33       | 112.52  | 109.33 | 58.70       |           |  |

C

| U87     |       |             | U251    |       |             |           |  |
|---------|-------|-------------|---------|-------|-------------|-----------|--|
| Control | shNC  | shLINC00339 | Control | shNC  | shLINC00339 | n=5, each |  |
| 15.00   | 13.00 | 4.00        | 12.00   | 10.00 | 2.00        |           |  |
| 18.00   | 17.00 | 2.00        | 10.00   | 12.00 | 3.00        |           |  |
| 22.00   | 20.00 | 5.00        | 8.00    | 5.00  | 0.00        |           |  |
| 26.00   | 25.00 | 7.00        | 18.00   | 19.00 | 6.00        |           |  |
| 10.00   | 11.00 | 1.00        | 15.00   | 14.00 | 5.00        |           |  |

D

| U87 migration  |        |             | U87 invasion  |        |             |           |  |
|----------------|--------|-------------|---------------|--------|-------------|-----------|--|
| Control        | shNC   | shLINC00339 | Control       | shNC   | shLINC00339 |           |  |
| 120.00         | 115.00 | 58.00       | 62.00         | 65.00  | 15.00       |           |  |
| 80.00          | 70.00  | 35.00       | 80.00         | 85.00  | 25.00       |           |  |
| 150.00         | 152.00 | 76.00       | 100.00        | 110.00 | 50.00       |           |  |
| 100.00         | 95.00  | 50.00       | 25.00         | 30.00  | 5.00        |           |  |
| 90.00          | 80.00  | 42.00       | 46.00         | 44.00  | 10.00       |           |  |
| U251 migration |        |             | U251 invasion |        |             |           |  |
| Control        | shNC   | shLINC00339 | Control       | shNC   | shLINC00339 | n=5, each |  |
| 110.00         | 110.00 | 40.00       | 50.00         | 48.00  | 20.00       |           |  |
| 65.00          | 70.00  | 10.00       | 40.00         | 35.00  | 10.00       |           |  |
| 125.00         | 135.00 | 50.00       | 80.00         | 78.00  | 30.00       |           |  |
| 145.00         | 150.00 | 75.00       | 95.00         | 92.00  | 50.00       |           |  |
| 90.00          | 95.00  | 30.00       | 70.00         | 67.00  | 30.00       |           |  |

E

| U87     |      |             |       | U251    |      |             |       |
|---------|------|-------------|-------|---------|------|-------------|-------|
| Control | shNC | shLINC00339 |       | Control | shNC | shLINC00339 |       |
| 0.93    | 0.90 | 0.10        |       | 1.30    | 1.42 | 0.94        |       |
| 1.35    | 1.20 | 0.25        |       | 0.70    | 0.83 | 0.55        |       |
| 1.16    | 1.14 | 0.16        | MMP2  | 0.85    | 1.15 | 0.77        | MMP2  |
| 0.62    | 0.58 | 0.11        |       | 0.93    | 1.22 | 0.61        |       |
| 0.76    | 0.77 | 0.03        |       | 1.10    | 0.77 | 0.69        |       |
| U87     |      |             |       | U251    |      |             |       |
| Control | shNC | shLINC00339 |       | Control | shNC | shLINC00339 |       |
| 0.76    | 0.80 | 0.50        |       | 1.06    | 1.10 | 0.58        |       |
| 0.65    | 0.68 | 0.26        |       | 0.86    | 0.80 | 0.40        |       |
| 0.50    | 0.53 | 0.19        | MMP14 | 0.68    | 0.59 | 0.33        | MMP14 |
| 0.88    | 0.91 | 0.34        |       | 0.93    | 0.96 | 0.48        |       |
| 0.70    | 0.77 | 0.40        |       | 0.78    | 0.77 | 0.40        |       |

n=5, each

Fig.3

A

| NBTs | LGGTs | HGGTs | n=3, NBTs group; n=10, each glioma tissue group |
|------|-------|-------|-------------------------------------------------|
| 1.13 | 0.75  | 0.15  |                                                 |
| 0.74 | 0.35  | 0.25  |                                                 |
| 1.33 | 0.59  | 0.45  |                                                 |
|      | 0.67  | 0.11  |                                                 |
|      | 0.40  | 0.29  |                                                 |
|      | 0.54  | 0.05  |                                                 |
|      | 0.45  | 0.30  |                                                 |
|      | 0.75  | 0.05  |                                                 |
|      | 0.40  | 0.04  |                                                 |
|      | 0.20  | 0.55  |                                                 |

B

|      |      |      |
|------|------|------|
| NHA  | U87  | U251 |
| 1.22 | 0.77 | 0.74 |
| 0.81 | 0.41 | 0.43 |
| 1.04 | 0.55 | 0.60 |
| 1.59 | 0.35 | 0.33 |
| 0.55 | 0.15 | 0.24 |

n=5, each

C

| U87     |        |          |         |                 | U251    |        |          |         |                 |
|---------|--------|----------|---------|-----------------|---------|--------|----------|---------|-----------------|
| Control | pre-NC | pre-miR- | anti-NC | anti-miR-539-5p | Control | pre-NC | pre-miR- | anti-NC | anti-miR-539-5p |
| 0.93    | 1.12   | 9.80     | 0.95    | 0.10            | 1.15    | 0.93   | 8.94     | 1.10    | 0.27            |
| 1.35    | 1.33   | 7.50     | 1.30    | 0.45            | 1.30    | 1.20   | 6.90     | 1.34    | 0.65            |
| 1.16    | 1.20   | 8.67     | 1.22    | 0.16            | 1.29    | 1.03   | 7.78     | 1.19    | 0.36            |
| 0.62    | 0.89   | 7.92     | 1.00    | 0.20            | 0.89    | 0.88   | 7.46     | 0.89    | 0.20            |
| 0.76    | 1.00   | 8.00     | 1.16    | 0.55            | 0.92    | 0.94   | 8.00     | 1.14    | 0.55            |

n=5, each

D

| U87     |        |          |         |                 | U251    |        |          |         |                 |
|---------|--------|----------|---------|-----------------|---------|--------|----------|---------|-----------------|
| Control | pre-NC | pre-miR- | anti-NC | anti-miR-539-5p | Control | pre-NC | pre-miR- | anti-NC | anti-miR-539-5p |
| 100.00  | 99.42  | 49.01    | 95.00   | 170.31          | 100.00  | 89.45  | 62.34    | 92.41   | 170.92          |
| 88.34   | 79.71  | 35.41    | 75.59   | 155.42          | 85.31   | 82.34  | 40.34    | 80.72   | 155.53          |
| 131.21  | 134.20 | 59.41    | 110.41  | 140.00          | 125.49  | 125.59 | 65.91    | 120.33  | 140.00          |
| 115.41  | 117.20 | 60.39    | 125.72  | 185.61          | 112.42  | 99.31  | 50.33    | 105.30  | 190.40          |
| 75.30   | 72.49  | 39.41    | 70.31   | 125.31          | 70.62   | 59.88  | 38.26    | 75.51   | 130.72          |

n=5, each

E

| U87     |        |          |         |                 | U251    |        |          |         |                 |
|---------|--------|----------|---------|-----------------|---------|--------|----------|---------|-----------------|
| Control | pre-NC | pre-miR- | anti-NC | anti-miR-539-5p | Control | pre-NC | pre-miR- | anti-NC | anti-miR-539-5p |
| 10.00   | 12.00  | 7.00     | 18.00   | 27.00           | 9.00    | 8.00   | 2.00     | 9.00    | 20.00           |
| 15.00   | 18.00  | 3.00     | 14.00   | 23.00           | 14.00   | 11.00  | 5.00     | 12.00   | 25.00           |
| 19.00   | 21.00  | 5.00     | 21.00   | 30.00           | 5.00    | 5.00   | 0.00     | 5.00    | 12.00           |
| 22.00   | 25.00  | 12.00    | 25.00   | 33.00           | 15.00   | 13.00  | 5.00     | 14.00   | 16.00           |
| 12.00   | 10.00  | 0.00     | 10.00   | 20.00           | 8.00    | 6.00   | 1.00     | 6.00    | 15.00           |

n=5, each

F

| U87 migration  |        |         |         |                 | U87 invasion  |        |         |         |                           |
|----------------|--------|---------|---------|-----------------|---------------|--------|---------|---------|---------------------------|
| Control        | pre-NC | pre-miR | anti-NC | anti-miR-539-5p | Control       | pre-NC | pre-miR | anti-NC | anti-miR-539-5p           |
| 110.00         | 115.00 | 55.00   | 115.00  | 140.00          | 70.00         | 75.00  | 25.00   | 73.00   | 85.00                     |
| 70.00          | 75.00  | 40.00   | 85.00   | 120.00          | 92.00         | 100.00 | 35.00   | 95.00   | 130.00                    |
| 125.00         | 125.00 | 75.00   | 125.00  | 179.00          | 50.00         | 52.00  | 10.00   | 52.00   | 125.00                    |
| 135.00         | 138.00 | 80.00   | 135.00  | 160.00          | 85.00         | 88.00  | 25.00   | 88.00   | 100.00                    |
| 85.00          | 88.00  | 50.00   | 95.00   | 135.00          | 66.00         | 69.00  | 30.00   | 70.00   | 100.00                    |
| U251 migration |        |         |         |                 | U251 invasion |        |         |         |                           |
| Control        | pre-NC | pre-miR | anti-NC | anti-miR-539-5p | Control       | pre-NC | pre-miR | anti-NC | anti-miR-539-5p n=5, each |
| 110.00         | 110.00 | 50.00   | 100.00  | 155.00          | 60.00         | 67.00  | 30.00   | 60.00   | 110.00                    |
| 85.00          | 85.00  | 40.00   | 80.00   | 140.00          | 45.00         | 53.00  | 10.00   | 50.00   | 80.00                     |
| 120.00         | 120.00 | 60.00   | 113.00  | 185.00          | 85.00         | 87.00  | 45.00   | 85.00   | 115.00                    |
| 130.00         | 129.00 | 75.00   | 125.00  | 170.00          | 90.00         | 93.00  | 40.00   | 90.00   | 120.00                    |
| 70.00          | 72.00  | 30.00   | 70.00   | 125.00          | 70.00         | 72.00  | 20.00   | 70.00   | 100.00                    |

G

| U87     |        |         |         |                 | U251    |        |         |         |                           |      |
|---------|--------|---------|---------|-----------------|---------|--------|---------|---------|---------------------------|------|
| Control | pre-NC | pre-miR | anti-NC | anti-miR-539-5p | Control | pre-NC | pre-miR | anti-NC | anti-miR-539-5p           |      |
| 0.93    | 1.32   | 0.46    | 1.59    | 2.43            | 1.20    | 1.00   | 0.50    | 1.00    | 1.79                      |      |
| 0.62    | 0.89   | 0.38    | 1.43    | 2.20            | 1.35    | 1.25   | 0.71    | 1.37    | 2.30                      |      |
| 0.76    | 0.75   | 0.29    | 1.32    | 2.10            | MMP2    | 1.00   | 1.10    | 0.60    | 1.20                      | 2.18 |
| 1.35    | 1.26   | 0.74    | 0.87    | 1.89            | 0.80    | 0.70   | 0.38    | 1.10    | 1.99                      |      |
| 1.17    | 1.14   | 0.62    | 1.10    | 1.96            | 1.10    | 1.39   | 0.40    | 0.68    | 1.50                      |      |
| U87     |        |         |         |                 | U251    |        |         |         |                           |      |
| Control | pre-NC | pre-miR | anti-NC | anti-miR-539-5p | Control | pre-NC | pre-miR | anti-NC | anti-miR-539-5p n=5, each |      |
| 1.28    | 1.20   | 0.64    | 1.30    | 2.50            | 0.75    | 0.80   | 0.38    | 0.70    | 1.69                      |      |
| 1.00    | 0.97   | 0.40    | 1.01    | 1.94            | 0.50    | 1.00   | 0.50    | 1.00    | 1.42                      |      |
| 0.65    | 0.80   | 0.59    | 0.86    | 1.62            | MMP14   | 1.00   | 0.58    | 0.20    | 0.46                      | 1.22 |
| 0.86    | 0.73   | 0.43    | 0.77    | 1.55            | 0.61    | 0.69   | 0.30    | 0.60    | 1.30                      |      |
| 0.59    | 0.60   | 0.21    | 0.90    | 1.38            | 0.60    | 0.50   | 0.19    | 0.61    | 1.36                      |      |

Fig.4

A

| U87     |      |             | U251    |      |             |
|---------|------|-------------|---------|------|-------------|
| Control | shNC | shLINC00339 | Control | shNC | shLINC00339 |
| 0.98    | 0.89 | 2.66        | 1.00    | 2.08 | 1.54        |
| 1.43    | 0.83 | 2.00        | 0.69    | 0.88 | 1.76        |
| 0.66    | 1.24 | 2.42        | 1.19    | 1.33 | 2.03        |

n=3, each

B

| Control | LINC00 | LINC00 | LINC00 | LINC00339-Mut+pre-miR |
|---------|--------|--------|--------|-----------------------|
| 0.90    | 0.91   | 0.38   | 0.87   | 0.83                  |
| 1.00    | 1.12   | 0.59   | 0.99   | 0.90                  |
| 1.15    | 1.20   | 0.45   | 1.10   | 1.00                  |

n=3, each

Fig.5

A

| U87     |        |         |        |               | U251    |          |         |        |               |
|---------|--------|---------|--------|---------------|---------|----------|---------|--------|---------------|
| Control | shNC+p | shLINC0 | shNC+a | shLINC00339+a | Control | shNC+pre | shLINC0 | shNC+a | shLINC00339+a |
| 100.00  | 90.32  | 37.20   | 94.61  | 98.61         | 100.00  | 93.50    | 55.25   | 98.62  | 110.34        |
| 79.34   | 70.00  | 30.31   | 75.00  | 75.12         | 79.42   | 66.00    | 39.42   | 67.32  | 72.35         |
| 107.39  | 106.00 | 42.41   | 110.42 | 112.69        | 140.72  | 132.83   | 44.78   | 110.38 | 94.45         |
| 129.91  | 129.45 | 51.00   | 129.10 | 130.36        | 110.50  | 108.02   | 57.92   | 120.49 | 87.69         |
| 91.45   | 65.50  | 20.34   | 66.51  | 70.83         | 83.71   | 77.72    | 27.48   | 83.41  | 119.06        |

n=5, each

B

| U87     |        |         |        |               | U251    |          |         |        |               |
|---------|--------|---------|--------|---------------|---------|----------|---------|--------|---------------|
| Control | shNC+p | shLINC0 | shNC+a | shLINC00339+a | Control | shNC+pre | shLINC0 | shNC+a | shLINC00339+a |
| 14.00   | 12.00  | 2.00    | 17.00  | 15.00         | 13.00   | 14.00    | 3.00    | 11.00  | 10.00         |
| 17.00   | 17.00  | 3.00    | 22.00  | 18.00         | 10.00   | 9.00     | 2.00    | 7.00   | 7.00          |
| 22.00   | 20.00  | 4.00    | 26.00  | 22.00         | 8.00    | 11.00    | 4.00    | 9.00   | 9.00          |
| 26.00   | 25.00  | 5.00    | 20.00  | 25.00         | 9.00    | 8.00     | 1.00    | 10.00  | 11.00         |
| 13.00   | 13.00  | 0.00    | 13.00  | 13.00         | 8.00    | 9.00     | 0.00    | 7.00   | 7.00          |

n=5, each

C

| U87 migration  |        |             |        |               | U87 invasion    |          |             |             |               |                 |                 |
|----------------|--------|-------------|--------|---------------|-----------------|----------|-------------|-------------|---------------|-----------------|-----------------|
| Control        | shNC+p | shLINC00339 | shNC+a | shLINC00339+a | Control         | shNC+pre | shLINC00339 | shNC+a      | shLINC00339+a | anti-miR-539-5p |                 |
| 110.00         | 105.00 | 45.00       | 106.00 | 107.00        | 65.00           | 65.00    | 25.00       | 88.00       | 90.00         |                 |                 |
| 85.00          | 90.00  | 25.00       | 88.00  | 90.00         | 50.00           | 52.00    | 10.00       | 65.00       | 67.00         |                 |                 |
| 130.00         | 125.00 | 10.00       | 127.00 | 128.00        | 80.00           | 82.00    | 5.00        | 55.00       | 54.00         |                 |                 |
| 145.00         | 135.00 |             | 133.00 | 135.00        | 95.00           | 94.00    | 28.00       | 92.00       | 87.00         |                 |                 |
| 80.00          | 85.00  |             | 85.00  | 80.00         | 55.00           | 57.00    | 17.00       | 60.00       | 62.00         |                 |                 |
| U251 migration |        |             |        |               | U251 invasion   |          |             |             |               |                 |                 |
| Control        | shNC+p | shLINC00339 | shNC+a | shLINC00339+a | anti-miR-539-5p | Control  | shNC+pre    | shLINC00339 | shNC+a        | shLINC00339+a   | anti-miR-539-5p |
| 110.00         | 111.00 | 50.00       | 100.00 | 110.00        |                 | 60       | 62          | 14          | 63            | 61              |                 |
| 90.00          | 90.00  | 30.00       | 85.00  | 90.00         |                 | 48       | 48          | 10          | 48            | 48              |                 |
| 125.00         | 130.00 | 20.00       | 125.00 | 130.00        |                 | 76       | 80          | 20          | 78            | 80              |                 |
| 140.00         | 137.00 | 62.00       | 135.00 | 138.00        |                 | 55       | 55          | 5           | 52            | 53              |                 |
| 65.00          | 66.00  | 20.00       | 65.00  | 66.00         |                 | 90       | 95          | 30          | 88            | 97              |                 |

n=5, each

D

| U87     |        |             |        |               | U251    |          |             |        |               |                 |       |
|---------|--------|-------------|--------|---------------|---------|----------|-------------|--------|---------------|-----------------|-------|
| Control | shNC+p | shLINC00339 | shNC+a | shLINC00339+a | Control | shNC+pre | shLINC00339 | shNC+a | shLINC00339+a | anti-miR-539-5p |       |
| 1.00    | 1.13   | 0.35        | 1.44   | 1.40          | 1.00    | 1.05     | 0.37        | 1.20   | 1.19          |                 |       |
| 1.10    | 1.05   | 0.59        | 1.13   | 1.23          | 1.15    | 1.20     | 0.56        | 1.05   | 1.00          |                 |       |
| 1.27    | 1.29   | 0.53        | 1.26   | 1.14          | MMP2    | 0.89     | 0.85        | 0.25   | 0.80          | 0.84            | MMP2  |
| 1.00    | 0.93   | 0.22        | 0.88   | 0.83          |         | 0.78     | 1.36        | 0.20   | 1.38          | 1.40            |       |
| 1.35    | 1.40   | 0.40        | 1.25   | 1.25          |         | 1.34     | 0.77        | 0.22   | 0.75          | 0.74            |       |
| U87     |        |             |        |               | U251    |          |             |        |               |                 |       |
| Control | shNC+p | shLINC00339 | shNC+a | shLINC00339+a | Control | shNC+pre | shLINC00339 | shNC+a | shLINC00339+a | anti-miR-539-5p |       |
| 0.85    | 0.90   | 0.25        | 0.90   | 0.83          |         | 0.8      | 0.77        | 0.26   | 0.83          | 0.85            |       |
| 1.05    | 1.12   | 0.10        | 1.20   | 1.00          |         | 1        | 0.65        | 0.44   | 0.95          | 0.99            |       |
| 0.78    | 0.80   | 0.32        | 0.82   | 0.70          | MMP14   | 0.69     | 0.7         | 0.15   | 0.69          | 0.7             | MMP14 |
| 0.89    | 1.00   | 0.40        | 0.90   | 0.90          |         | 0.73     | 0.94        | 0.3    | 0.9           | 0.9             |       |
| 0.66    | 0.86   | 0.11        | 0.85   | 0.80          |         | 0.77     | 0.8         | 0.35   | 0.8           | 0.85            |       |

n=5, each



Fig.6

A

| U87     |        |         |         |                 | U251    |        |         |         |                 |           |
|---------|--------|---------|---------|-----------------|---------|--------|---------|---------|-----------------|-----------|
| Control | pre-NC | pre-miR | anti-NC | anti-miR-539-5p | Control | pre-NC | pre-miR | anti-NC | anti-miR-539-5p | n=3, each |
| 1.44    | 1.72   | 0.11    | 1.27    | 2.30            | 1.02    | 1.00   | 0.45    | 0.80    | 2.07            |           |
| 0.79    | 0.94   | 0.30    | 0.76    | 1.78            | 0.82    | 0.84   | 0.52    | 1.22    | 1.80            |           |
| 1.27    | 1.30   | 0.48    | 1.20    | 2.22            | 1.13    | 1.13   | 0.33    | 0.99    | 2.41            |           |

B

| Control | TWIST | TWIST | TWIST | TWIST1-Mut+p | n=3, each |
|---------|-------|-------|-------|--------------|-----------|
| 1.26    | 0.94  | 0.53  | 1.03  | 0.95         |           |
| 1.00    | 1.19  | 0.40  | 1.23  | 1.23         |           |
| 1.11    | 0.97  | 0.65  | 0.90  | 0.87         |           |

Fig.7

A

| U87     |         |         |         |                       | U251    |         |         |         |                       |            |
|---------|---------|---------|---------|-----------------------|---------|---------|---------|---------|-----------------------|------------|
| Control | pre-NC+ | pre-miR | pre-miR | pre-miR-539-5p+TWIST1 | Control | pre-NC+ | pre-miR | pre-miR | pre-miR-539-5p+TWIST1 | -n=5, each |
| 100.00  | 115.00  | 51.48   | 169.32  | 128.43                | 100.00  | 90.80   | 42.48   | 155.47  | 105.50                |            |
| 86.45   | 78.32   | 42.36   | 145.06  | 10.37                 | 88.88   | 70.37   | 35.30   | 137.48  | 85.29                 |            |
| 126.40  | 128.89  | 65.00   | 186.42  | 135.04                | 135.62  | 116.64  | 70.39   | 180.84  | 135.62                |            |
| 117.73  | 90.00   | 37.52   | 155.30  | 120.82                | 120.30  | 115.09  | 50.63   | 169.74  | 127.47                |            |
| 80.35   | 83.67   | 28.44   | 120.49  | 85.39                 | 65.19   | 60.48   | 30.37   | 125.03  | 70.29                 |            |

B

| U87     |         |         |         |                       | U251    |         |         |         |                       |            |
|---------|---------|---------|---------|-----------------------|---------|---------|---------|---------|-----------------------|------------|
| Control | pre-NC+ | pre-miR | pre-miR | pre-miR-539-5p+TWIST1 | Control | pre-NC+ | pre-miR | pre-miR | pre-miR-539-5p+TWIST1 | -n=5, each |
| 15.00   | 17.00   | 1.00    | 25.00   | 22.00                 | 10.00   | 11.00   | 2.00    | 18.00   | 14.00                 |            |
| 17.00   | 21.00   | 3.00    | 29.00   | 26.00                 | 7.00    | 9.00    | 0.00    | 12.00   | 10.00                 |            |
| 25.00   | 27.00   | 8.00    | 35.00   | 32.00                 | 13.00   | 15.00   | 4.00    | 20.00   | 16.00                 |            |
| 15.00   | 22.00   | 5.00    | 28.00   | 25.00                 | 12.00   | 13.00   | 3.00    | 18.00   | 18.00                 |            |
| 23.00   | 15.00   | 2.00    | 30.00   | 29.00                 | 9.00    | 9.00    | 1.00    | 15.00   | 10.00                 |            |

C

| U87 migration  |         |         |         |                 | U87 invasion  |         |         |         |                 |                  |  |  |
|----------------|---------|---------|---------|-----------------|---------------|---------|---------|---------|-----------------|------------------|--|--|
| Control        | pre-NC+ | pre-miR | pre-miR | pre-miR-539-5p+ | Control       | pre-NC+ | pre-miR | pre-miR | pre-miR-539-5p+ | TWIST1-ORF-3'UTR |  |  |
| 110.00         | 112.00  | 40.00   | 160.00  | 125.00          | 67.00         | 70.00   | 37.00   | 112.00  | 77.00           |                  |  |  |
| 90.00          | 93.00   | 30.00   | 130.00  | 99.00           | 80.00         | 85.00   | 48.00   | 125.00  | 90.00           |                  |  |  |
| 130.00         | 132.00  | 40.00   | 179.00  | 140.00          | 46.00         | 50.00   | 25.00   | 100.00  | 58.00           |                  |  |  |
| 145.00         | 149.00  | 60.00   | 200.00  | 150.00          | 56.00         | 60.00   | 32.00   | 105.00  | 69.00           |                  |  |  |
| 80.00          | 84.00   | 20.00   | 110.00  | 90.00           | 40.00         | 45.00   | 19.00   | 75.00   | 50.00           |                  |  |  |
| U251 migration |         |         |         |                 | U251 invasion |         |         |         |                 |                  |  |  |
| Control        | pre-NC+ | pre-miR | pre-miR | pre-miR-539-5p+ | Control       | pre-NC+ | pre-miR | pre-miR | pre-miR-539-5p+ | TWIST1-ORF-3'UTR |  |  |
| 110.00         | 113.00  | 45.00   | 139.00  | 118.00          | 80.00         | 72.00   | 25.00   | 100.00  | 95.00           |                  |  |  |
| 90.00          | 87.00   | 33.00   | 115.00  | 98.00           | 60.00         | 61.00   | 18.00   | 90.00   | 75.00           |                  |  |  |
| 125.00         | 125.00  | 45.00   | 162.00  | 132.00          | 100.00        | 105.00  | 48.00   | 130.00  | 115.00          |                  |  |  |
| 140.00         | 143.00  | 55.00   | 180.00  | 145.00          | 90.00         | 88.00   | 35.00   | 120.00  | 100.00          |                  |  |  |
| 85.00          | 82.00   | 20.00   | 124.00  | 88.00           | 50.00         | 55.00   | 15.00   | 100.00  | 82.00           |                  |  |  |

D

| U87     |         |         |         |                 | U251            |                  |         |         |                 |                  |                 |                  |
|---------|---------|---------|---------|-----------------|-----------------|------------------|---------|---------|-----------------|------------------|-----------------|------------------|
| Control | pre-NC+ | pre-miR | pre-miR | pre-miR-539-5p+ | Control         | pre-NC+          | pre-miR | pre-miR | pre-miR-539-5p+ | TWIST1-ORF-3'UTR |                 |                  |
| 1.39    | 1.40    | 0.30    | 2.10    | 1.60            | 1.00            | 1.15             | 0.48    | 1.60    | 1.42            |                  |                 |                  |
| 0.80    | 0.85    | 0.54    | 2.45    | 1.77            | 1.00            | 1.00             | 0.56    | 1.87    | 1.30            |                  |                 |                  |
| 1.50    | 1.52    | 0.25    | 2.00    | 1.49            | MMP2            | 1.38             | 1.10    | 0.37    | 1.75            | 1.00             | MMP2            |                  |
| 1.00    | 0.90    | 0.18    | 1.97    | 1.28            | 0.97            | 1.36             | 0.25    | 1.70    | 1.55            |                  |                 |                  |
| 0.94    | 1.15    | 0.20    | 1.89    | 1.35            | 1.00            | 0.99             | 0.30    | 1.55    | 1.20            |                  |                 |                  |
| U87     |         |         |         |                 | U251            |                  |         |         |                 |                  |                 |                  |
|         | Control | pre-NC+ | pre-miR | pre-miR         | pre-miR-539-5p+ | TWIST1-ORF-3'UTR | Control | pre-NC+ | pre-miR         | pre-miR          | pre-miR-539-5p+ | TWIST1-ORF-3'UTR |
|         | 0.85    | 0.90    | 0.25    | 1.80            | 1.40            |                  | 0.60    | 0.64    | 0.15            | 1.25             | 0.85            |                  |
|         | 0.99    | 1.00    | 0.33    | 2.00            | 0.85            |                  | 0.40    | 0.45    | 0.30            | 1.42             | 1.00            |                  |
|         | 0.72    | 0.75    | 0.54    | 1.69            | 1.50            | MMP14            | 0.70    | 0.70    | 0.22            | 1.30             | 1.13            | MMP14            |
|         | 0.80    | 1.23    | 0.20    | 1.80            | 0.91            |                  | 0.55    | 0.60    | 0.10            | 1.00             | 0.78            |                  |
|         | 1.15    | 0.80    | 0.18    | 1.90            | 1.20            |                  | 0.70    | 0.69    | 0.10            | 1.55             | 0.84            |                  |

Fig.8

A

| U87 | PCR1  |     |        | PCR2  |     |        | PCR3  |     |        |
|-----|-------|-----|--------|-------|-----|--------|-------|-----|--------|
|     | input | IgG | TWIST1 | input | IgG | TWIST1 | input | IgG | TWIST1 |
|     | 1.07  |     | 0.93   | 1.11  |     | 0.81   | 0.91  |     |        |
|     | 0.86  |     | 0.88   | 0.83  |     | 1.05   | 1.08  |     |        |
|     | 1.15  |     | 1.22   | 0.94  |     | 1.10   | 1.03  |     |        |

  

| U251 | PCR1  |     |        | PCR2  |     |        | PCR3  |     |        |
|------|-------|-----|--------|-------|-----|--------|-------|-----|--------|
|      | input | IgG | TWIST1 | input | IgG | TWIST1 | input | IgG | TWIST1 |
|      | 0.98  |     | 1.12   | 1.02  |     | 1.08   | 1.18  |     |        |
|      | 1.21  |     | 0.83   | 1.25  |     | 1.07   | 0.82  |     |        |
|      | 0.85  |     | 0.97   | 0.79  |     | 1.03   | 0.87  |     |        |

n=3 each

B

| U87 | PCR1  |     |        | PCR2  |     |        | PCR3  |     |        |
|-----|-------|-----|--------|-------|-----|--------|-------|-----|--------|
|     | input | IgG | TWIST1 | input | IgG | TWIST1 | input | IgG | TWIST1 |
|     | 1.13  |     | 0.87   | 0.74  |     | 1.02   | 1.16  |     |        |
|     | 0.94  |     | 1.02   | 0.99  |     | 1.18   | 1.09  |     |        |
|     | 0.93  |     | 1.12   | 1.03  |     | 0.82   | 1.02  |     |        |

  

| U251 | PCR1  |     |        | PCR2  |     |        | PCR3  |     |        |
|------|-------|-----|--------|-------|-----|--------|-------|-----|--------|
|      | input | IgG | TWIST1 | input | IgG | TWIST1 | input | IgG | TWIST1 |
|      | 1.02  |     | 0.85   | 1.32  |     | 0.92   | 1.08  |     |        |
|      | 0.95  |     | 0.69   | 0.71  |     | 1.18   | 1.02  |     |        |
|      | 1.05  |     | 1.40   | 0.86  |     | 1.21   | 1.14  |     |        |

n=3 each

Fig.9

| A   | Days | Control |    |   | shNC+pre-NC |    |   | shLINC00339 |    |   | pre-miR-539-5p |    |   | shLINC00339+pre-miR-539-5p |    |   |
|-----|------|---------|----|---|-------------|----|---|-------------|----|---|----------------|----|---|----------------------------|----|---|
| U87 | 5    | 110     | 40 | 8 | 90          | 40 | 8 | 70          | 40 | 8 | 70             | 40 | 8 | 50                         | 40 | 8 |
|     | 10   | 180     | 40 | 8 | 190         | 40 | 8 | 130         | 40 | 8 | 125            | 40 | 8 | 60                         | 40 | 8 |
|     | 15   | 300     | 40 | 8 | 280         | 40 | 8 | 200         | 40 | 8 | 180            | 40 | 8 | 70                         | 40 | 8 |
|     | 20   | 430     | 35 | 8 | 400         | 35 | 8 | 250         | 35 | 8 | 225            | 35 | 8 | 120                        | 35 | 8 |
|     | 25   | 530     | 35 | 8 | 500         | 35 | 8 | 365         | 35 | 8 | 330            | 35 | 8 | 170                        | 35 | 8 |
|     | 30   | 580     | 35 | 8 | 590         | 35 | 8 | 430         | 35 | 8 | 400            | 35 | 8 | 205                        | 35 | 8 |

|    |     |    |   |     |    |   |     |    |   |     |    |   |     |    |   |
|----|-----|----|---|-----|----|---|-----|----|---|-----|----|---|-----|----|---|
| 35 | 610 | 40 | 8 | 640 | 40 | 8 | 500 | 40 | 8 | 480 | 40 | 8 | 265 | 40 | 8 |
| 40 | 700 | 40 | 8 | 710 | 40 | 8 | 550 | 40 | 8 | 510 | 40 | 8 | 310 | 40 | 8 |
| 45 | 790 | 40 | 8 | 760 | 40 | 8 | 610 | 40 | 8 | 600 | 40 | 8 | 365 | 40 | 8 |

| U251 | Days | Control |    |     | shNC+pre-NC |    |     | shLINC00339 |    |     | pre-miR-539-5p |    |     | shLINC00339+pre-miR-539-5p |    |   |
|------|------|---------|----|-----|-------------|----|-----|-------------|----|-----|----------------|----|-----|----------------------------|----|---|
|      | 5    | 100     | 40 | 8   | 90          | 40 | 8   | 70          | 40 | 8   | 70             | 40 | 8   | 40                         | 40 | 8 |
| 10   | 170  | 40      | 8  | 190 | 40          | 8  | 125 | 40          | 8  | 120 | 40             | 8  | 50  | 40                         | 8  |   |
| 15   | 290  | 40      | 8  | 280 | 40          | 8  | 169 | 40          | 8  | 160 | 40             | 8  | 60  | 40                         | 8  |   |
| 20   | 400  | 35      | 8  | 380 | 35          | 8  | 175 | 35          | 8  | 180 | 35             | 8  | 70  | 35                         | 8  |   |
| 25   | 460  | 35      | 8  | 450 | 35          | 8  | 250 | 35          | 8  | 269 | 35             | 8  | 98  | 35                         | 3  |   |
| 30   | 570  | 35      | 8  | 580 | 35          | 8  | 320 | 35          | 8  | 330 | 35             | 8  | 115 | 35                         | 8  |   |
| 35   | 600  | 40      | 8  | 640 | 40          | 8  | 400 | 40          | 8  | 400 | 40             | 8  | 175 | 40                         | 8  |   |
| 40   | 680  | 40      | 8  | 710 | 40          | 8  | 469 | 40          | 8  | 450 | 40             | 8  | 210 | 40                         | 8  |   |
| 45   | 770  | 40      | 8  | 750 | 40          | 8  | 500 | 40          | 8  | 510 | 40             | 8  | 260 | 40                         | 8  |   |

**B**

| Days | U87     |         |         |           | Days | U251                       |         |         |         |           |
|------|---------|---------|---------|-----------|------|----------------------------|---------|---------|---------|-----------|
|      | Control | shNC+pr | shLINC0 | pre-miR-5 |      | shLINC00339+pre-miR-539-5p | Control | shNC+pr | shLINC0 | pre-miR-5 |
| 1    |         |         |         |           | 1    |                            |         |         |         |           |
| 2    |         |         |         |           | 2    |                            |         |         |         |           |
| 3    |         |         |         |           | 3    |                            |         |         |         |           |
| 4    |         |         |         |           | 4    |                            |         |         |         |           |
| 5    |         |         |         |           | 5    |                            |         |         |         |           |
| 6    |         |         |         |           | 6    |                            |         |         |         |           |
| 7    |         |         |         |           | 7    |                            |         |         |         |           |
| 8    |         |         |         |           | 8    |                            |         |         |         |           |
| 9    |         |         |         |           | 9    |                            |         |         |         |           |
| 10   |         |         |         |           | 10   |                            |         |         |         |           |
| 11   | 1       |         |         |           | 11   | 1                          |         |         |         |           |
| 12   |         | 1       |         |           | 12   |                            | 2       |         |         |           |

|    |   |   |   |   |   |
|----|---|---|---|---|---|
| 13 | 1 |   |   |   |   |
| 14 |   | 2 |   |   |   |
| 15 |   | 1 |   |   |   |
| 16 | 1 |   |   |   |   |
| 17 |   | 1 |   |   |   |
| 18 | 2 |   |   |   |   |
| 19 |   |   |   |   |   |
| 20 |   | 1 | 1 |   |   |
| 21 | 1 |   |   | 1 |   |
| 22 |   |   |   |   |   |
| 23 |   | 1 | 2 |   |   |
| 24 | 1 |   |   | 1 |   |
| 25 | 1 |   |   |   |   |
| 26 |   | 1 | 1 |   |   |
| 27 |   |   | 1 | 1 |   |
| 28 |   |   |   |   | 1 |
| 29 |   |   | 1 | 1 |   |
| 30 |   |   |   |   |   |
| 31 |   |   |   |   | 1 |
| 32 |   |   | 1 | 1 |   |
| 33 |   |   |   |   |   |
| 34 |   |   | 1 |   |   |
| 35 |   |   |   | 1 | 1 |
| 36 |   |   |   |   | 2 |
| 37 |   |   |   | 2 |   |
| 38 |   |   |   | 2 |   |
| 39 |   |   |   |   | 1 |
| 40 |   |   |   |   |   |
| 41 |   |   |   |   | 1 |
| 42 |   |   |   |   |   |
| 43 |   |   |   |   |   |
| 44 |   |   |   |   | 1 |

|    |   |  |   |   |   |
|----|---|--|---|---|---|
| 13 |   |  | 1 |   |   |
| 14 | 1 |  |   |   |   |
| 15 |   |  | 1 |   |   |
| 16 | 2 |  |   |   |   |
| 17 |   |  |   |   |   |
| 18 |   |  | 1 |   |   |
| 19 | 1 |  |   |   |   |
| 20 |   |  |   |   |   |
| 21 |   |  | 1 | 2 |   |
| 22 | 1 |  |   |   |   |
| 23 | 1 |  |   |   | 1 |
| 24 |   |  | 1 | 1 |   |
| 25 |   |  |   | 1 |   |
| 26 |   |  |   |   | 1 |
| 27 |   |  | 1 | 1 |   |
| 28 | 1 |  |   |   | 1 |
| 29 |   |  |   |   |   |
| 30 |   |  |   | 1 |   |
| 31 |   |  |   |   | 1 |
| 32 |   |  |   | 1 |   |
| 33 |   |  |   |   |   |
| 34 |   |  |   |   |   |
| 35 |   |  |   |   | 1 |
| 36 |   |  |   |   | 2 |
| 37 |   |  |   |   | 2 |
| 38 |   |  |   | 1 |   |
| 39 |   |  |   |   | 1 |
| 40 |   |  |   |   |   |
| 41 |   |  |   |   | 1 |
| 42 |   |  |   |   |   |
| 43 |   |  |   |   |   |
| 44 |   |  |   |   | 1 |

45

45

46

1

47

C

| U87     |         |         |          |                          | U251    |          |         |          |                            |  |  |  |
|---------|---------|---------|----------|--------------------------|---------|----------|---------|----------|----------------------------|--|--|--|
| Control | shNC+pr | shLINC0 | pre-miR- | shLINC00339+pre-miR-539- | Control | shNC+pre | shLINC0 | pre-miR- | shLINC00339+pre-miR-539-5p |  |  |  |
| 4       | 3       | 1       | 1        | 0                        | 4       | 5        | 1       | 1        | 1                          |  |  |  |
| 5       | 4       | 0       | 2        | 1                        | 2       | 3        | 1       | 2        | 1                          |  |  |  |
| 2       | 3       | 2       | 2        | 0                        | 6       | 6        | 2       | 3        | 0                          |  |  |  |
